# Supplementary material for: Food 4 Health - He Oranga Kai: Assessing the efficacy, acceptability and economic implications of Lactobacillus rhamnosus HN001 and β-glucan to improve glycated haemoglobin, metabolic health, and general well-being in adults with pre-diabetes: study protocol for a 2 × 2 factorial design, parallel group, placebo-controlled randomized controlled trial, with embedded qualitative study and economic analysis
Source: Springer Nature journal article supplement (doi:10.1186/s13063-019-3553-7), 2019-07-29
Supplement: MOESM1 [file 17019752]

Additional file 1

Food 4 Health – He Oranga Kai: Comparison of cereal nutritional values

|                      | Active Cereal |          |                                         |        |                                          | Control Cereal |          |          |        |                                        |
|----------------------|---------------|----------|-----------------------------------------|--------|------------------------------------------|----------------|----------|----------|--------|----------------------------------------|
|                      | Oats          |          | Oatwell 28%XF or<br>SWEOAT BRAN BG28 XF |        | Total<br>Per dose<br>Prebiotic<br>cereal | Cornflakes     |          | Creamer  |        | Total<br>Per dose<br>control<br>cereal |
|                      | per 100g      | Per 40 g | per 100g                                | Per 8g |                                          | per 100g       | Per 35 g | per 100g | Per 8g |                                        |
| <b>Energy (kj)</b>   | 1600.0        | 640.0    | 1160.0                                  | 92.8   | <b>732.8</b>                             | 1550.0         | 542.5    | 2315.0   | 185.2  | <b>727.7</b>                           |
| <b>Protein (g)</b>   | 12.8          | 5.1      | 23.0                                    | 1.8    | <b>7.0</b>                               | 7.4            | 2.5      | 2.0      | 0.2    | <b>2.8</b>                             |
| <b>Fat, total</b>    | 9.2           | 3.7      | 5.0                                     | 0.4    | <b>4.1</b>                               | 0.3            | 0.1      | 35.0     | 2.8    | <b>2.9</b>                             |
| <b>Saturated</b>     | 1.7           | 0.7      | 1.0                                     | 0.1    | <b>0.8</b>                               | 0.1            | 0.0      | 34.4     | 2.8    | <b>2.8</b>                             |
| <b>Carbohydrate</b>  | 56.7          | 22.7     | 9.0                                     | 0.7    | <b>23.4</b>                              | 82.1           | 28.7     | 58.0     | 4.6    | <b>33.4</b>                            |
| <b>Sugars</b>        | 1.0           | 0.4      |                                         | 0.0    | <b>0.4</b>                               | 7.7            | 2.9      | 14.0     | 1.1    | <b>3.8</b>                             |
| <b>Dietary fibre</b> | 9.2           | 3.7      | 52.0                                    | 4.2    | <b>7.8</b>                               | 2.7            | 0.9      |          |        | <b>0.9</b>                             |
| <b>Soluble</b>       | 4.5           | 1.8      | 28.0                                    | 2.2    | <b>4.0</b>                               |                |          |          |        |                                        |
| <b>Insoluble</b>     | 5.7           | 2.3      | 24.0                                    | 1.9    | <b>4.2</b>                               |                |          |          |        |                                        |
| <b>Beta glucan</b>   | 4.5           | 1.8      | 28.0                                    | 2.2    | <b>4.0</b>                               |                |          |          |        |                                        |
| <b>Sodium (mg)</b>   | 6.0           | 2.4      |                                         | 0.0    | <b>2.4</b>                               | 550.0          | 199.5    |          |        | <b>199.5</b>                           |
