# Supplementary material for: Food 4 Health - He Oranga Kai: Assessing the efficacy, acceptability and economic implications of Lactobacillus rhamnosus HN001 and β-glucan to improve glycated haemoglobin, metabolic health, and general well-being in adults with pre-diabetes: study protocol for a 2 × 2 factorial design, parallel group, placebo-controlled randomized controlled trial, with embedded qualitative study and economic analysis
Source: Springer Nature journal article supplement (doi:10.1186/s13063-019-3553-7), 2019-07-29
Supplement: MOESM3 [file 17019752]

## Additional File 3

### Food 4 Health - He Orangi Kai: Tables for baseline characteristics and results

Table 1: Baseline demographic details and comorbid conditions

|                                                         | HN001     | Beta-glucan | HN001+beta-glucan | Placebo   |
|---------------------------------------------------------|-----------|-------------|-------------------|-----------|
| <b>Demographic characteristics</b>                      | N=        | N=          | N=                | N=        |
| Age (in years) (Mean, SD)                               | Mean (SD) | Mean (SD)   | Mean (SD)         | Mean (SD) |
| Gender (male)                                           | n (%)     | n (%)       | n (%)             | n (%)     |
| Ethnicity <sup>a</sup>                                  |           |             |                   |           |
| Maori ethnicity                                         | n (%)     | n (%)       | n (%)             | n (%)     |
| Pacific ethnicity                                       | n (%)     | n (%)       | n (%)             | n (%)     |
| Indian/South Asian <sup>b</sup>                         | n (%)     | n (%)       | n (%)             | n (%)     |
| Other Asian ethnicity                                   | n (%)     | n (%)       | n (%)             | n (%)     |
| European/Pakeha ethnicity                               | n (%)     | n (%)       | n (%)             | n (%)     |
| Other ethnicity                                         | n (%)     | n (%)       | n (%)             | n (%)     |
| Household income (\$NZ)                                 |           |             |                   |           |
| 0-49,000                                                | n (%)     | n (%)       | n (%)             | n (%)     |
| 50-99,000                                               | n (%)     | n (%)       | n (%)             | n (%)     |
| 100-149,000                                             | n (%)     | n (%)       | n (%)             | n (%)     |
| 150,000 +                                               | n (%)     | n (%)       | n (%)             | n (%)     |
| <b>History of co-morbid conditions</b>                  |           |             |                   |           |
| 1 <sup>st</sup> degree relative with T2 diabetes        | n (%)     | n (%)       | n (%)             | n (%)     |
| Gestational diabetes<br>(if previous pregnancy>20weeks) | n (%)     | n (%)       | n (%)             | n (%)     |
| Polycystic ovarian syndrome<br>(if female)              | n (%)     | n (%)       | n (%)             | n (%)     |
| Heart disease <sup>c</sup>                              | n (%)     | n (%)       | n (%)             | n (%)     |
| Hypertension                                            | n (%)     | n (%)       | n (%)             | n (%)     |
| Dislipidemia                                            | n (%)     | n (%)       | n (%)             | n (%)     |
| Stroke                                                  | n (%)     | n (%)       | n (%)             | n (%)     |
| Depression <sup>d</sup>                                 | n (%)     | n (%)       | n (%)             | n (%)     |
| Anxiety                                                 | n (%)     | n (%)       | n (%)             | n (%)     |
| Other mental health illness                             | n (%)     | n (%)       | n (%)             | n (%)     |

<sup>a</sup>Ethnicity is defined as single ethnicity with order of priority as Maori, Pacific, Indian/South Asian, South East Asian,

<sup>b</sup>Indian/South Asian includes Indian, Fijian Indian, Bangladeshi, Pakistani, Afghani, Bhutanese, Nepalese, Sri Lankan and Maldivian.

<sup>c</sup>Heart disease is defined as having a history of angina, heart failure or heart attack.

<sup>d</sup>Depression is defined participant ever told by a health professional that they were depressed or needed anti-depressant medication

<sup>e</sup>Anxiety is defined as participant ever told by a health professional that they were anxious or needed treatment for anxiety

<sup>f</sup>Other mental health condition is defined as other condition mental health condition for which participant is currently receiving treatment

Table 2: Baseline distribution of physical activity level, diet, smoking, alcohol consumption, Recreational drug use, medication or supplement use. (*potential confounders or effect modifiers*)

|                                       | HN001     | Beta-glucan | HN001+beta-glucan | Placebo   |
|---------------------------------------|-----------|-------------|-------------------|-----------|
| <b>Physical activity level</b>        |           |             |                   |           |
| Inactive                              | n (%)     | n (%)       | n (%)             | n (%)     |
| Light (1-2 times a week)              | n (%)     | n (%)       | n (%)             | n (%)     |
| Moderate (3+ times a week)            | n (%)     | n (%)       | n (%)             | n (%)     |
| Vigorous (3+ times a week)            | n (%)     | n (%)       | n (%)             | n (%)     |
| <b>Diet (once a week or more)</b>     |           |             |                   |           |
| Yoghurt                               | n (%)     | n (%)       | n (%)             | n (%)     |
| Fermented foods                       | n (%)     | n (%)       | n (%)             | n (%)     |
| Artificial sweeteners                 | n (%)     | n (%)       | n (%)             | n (%)     |
| Oats                                  | n (%)     | n (%)       | n (%)             | n (%)     |
| Total calorie intake <sup>a</sup>     | Mean (SD) | Mean (SD)   | Mean (SD)         | Mean (SD) |
| <b>Smoking</b>                        |           |             |                   |           |
| Current smoker                        | n (%)     | n (%)       | n (%)             | n (%)     |
| <b>Prescribed and OTT Medications</b> |           |             |                   |           |
| Antibiotics in last 6 months          | n (%)     | n (%)       | n (%)             | n (%)     |
| Oral or injected steroids             | n (%)     | n (%)       | n (%)             | n (%)     |
| Proton pump inhibitors/Antacids       | n (%)     | n (%)       | n (%)             | n (%)     |
| Antihypertensives/diuretics           | n (%)     | n (%)       | n (%)             | n (%)     |
| Lipid lowering medications            | n (%)     | n (%)       | n (%)             | n (%)     |
| Bowel medications                     | n (%)     | n (%)       | n (%)             | n (%)     |
| Antidepressant/anxiolytic             | n (%)     | n (%)       | n (%)             | n (%)     |
| <b>Supplements containing</b>         |           |             |                   |           |
| Fibre/Prebiotic                       | n (%)     | n (%)       | n (%)             | n (%)     |
| Fish oil                              | n (%)     | n (%)       | n (%)             | n (%)     |

<sup>a</sup>Estimated from 3-day food diary

Table 2 will be repeated at 3, 6 and 9 months and include use of non-study probiotics.

Table 3: Baseline values of participant outcome measures

| Outcomes                                  | HN001     | Beta-glucan | HN001+beta-glucan | Placebo   |
|-------------------------------------------|-----------|-------------|-------------------|-----------|
| <b>Metabolic outcome measures</b>         | N=        | N=          | N=                | N=        |
| HbA1c (mmol/mol)<br>(%)                   | Mean (SD) | Mean (SD)   | Mean (SD)         | Mean (SD) |
| Fasting serum glucose (mmol/L)            | Mean (SD) | Mean (SD)   | Mean (SD)         | Mean (SD) |
| Insulin resistance (HOMA-IR)              | Mean (SD) | Mean (SD)   | Mean (SD)         | Mean (SD) |
| Fasting Lipids (mmol/L)                   |           |             |                   |           |
| Total Cholesterol                         | Mean (SD) | Mean (SD)   | Mean (SD)         | Mean (SD) |
| LDL                                       | Mean (SD) | Mean (SD)   | Mean (SD)         | Mean (SD) |
| HDL                                       | Mean (SD) | Mean (SD)   | Mean (SD)         | Mean (SD) |
| Triglycerides                             | Mean (SD) | Mean (SD)   | Mean (SD)         | Mean (SD) |
| Anthropometry                             |           |             |                   |           |
| Weight (kg)                               | Mean (SD) | Mean (SD)   | Mean (SD)         | Mean (SD) |
| BMI (weight (kg)/height (m <sup>2</sup> ) | Mean (SD) | Mean (SD)   | Mean (SD)         | Mean (SD) |
| Waist circumference (cm)                  | Mean (SD) | Mean (SD)   | Mean (SD)         | Mean (SD) |
| Blood pressure (mmHg)                     |           |             |                   |           |
| Systolic                                  | Mean (SD) | Mean (SD)   | Mean (SD)         | Mean (SD) |
| Diastolic                                 | Mean (SD) | Mean (SD)   | Mean (SD)         | Mean (SD) |
| <b>Mental Health outcome measures</b>     | N=        | N=          | N=                | N=        |
| DASS Total score                          | Mean (SD) | Mean (SD)   | Mean (SD)         | Mean (SD) |
| DASS Depression subscale                  | Mean (SD) | Mean (SD)   | Mean (SD)         | Mean (SD) |
| DASS Anxiety subscale                     | Mean (SD) | Mean (SD)   | Mean (SD)         | Mean (SD) |
| DASS Stress subscale                      | Mean (SD) | Mean (SD)   | Mean (SD)         | Mean (SD) |
| SF 36                                     | Mean (SD) | Mean (SD)   | Mean (SD)         | Mean (SD) |
| Physical Functioning                      | Mean (SD) | Mean (SD)   | Mean (SD)         | Mean (SD) |
| Role Physical                             | Mean (SD) | Mean (SD)   | Mean (SD)         | Mean (SD) |
| Bodily Pain                               | Mean (SD) | Mean (SD)   | Mean (SD)         | Mean (SD) |
| General Health                            | Mean (SD) | Mean (SD)   | Mean (SD)         | Mean (SD) |
| Vitality                                  | Mean (SD) | Mean (SD)   | Mean (SD)         | Mean (SD) |
| Social Functioning                        | Mean (SD) | Mean (SD)   | Mean (SD)         | Mean (SD) |
| Role Emotional                            | Mean (SD) | Mean (SD)   | Mean (SD)         | Mean (SD) |
| Mental Health                             | Mean (SD) | Mean (SD)   | Mean (SD)         | Mean (SD) |
| Physical Component Summary PCS            | Mean (SD) | Mean (SD)   | Mean (SD)         | Mean (SD) |
| Mental Component Summary (MCS)            | Mean (SD) | Mean (SD)   | Mean (SD)         | Mean (SD) |

Table 4 The adjusted<sup>a</sup> effects of HN001 and B-glucan and their interaction on the primary and secondary outcome variables.

|                                                        | HN001            |                 | Mean diff<br>(95% CI) | P= | B-glucan         |                 | Mean diff (95%<br>CI) | P= | P for<br>interaction |
|--------------------------------------------------------|------------------|-----------------|-----------------------|----|------------------|-----------------|-----------------------|----|----------------------|
|                                                        | Yes<br>Mean (SD) | No<br>Mean (SD) |                       |    | Yes<br>Mean (SD) | No<br>Mean (SD) |                       |    |                      |
| <b>Primary outcome</b>                                 |                  |                 |                       |    |                  |                 |                       |    |                      |
| HbA1c(mmol/mol) at 6 mths (%)                          | xx.x (xx)        | xx.x (xx)       | xx.x (95% CI)         | P= | xx.x (xx)        | xx.x (xx)       | xx.x (95% CI)         | P= | P=                   |
| <b>Secondary outcomes</b>                              |                  |                 |                       |    |                  |                 |                       |    |                      |
| HbA1c(mmol/mol) at 3 mths (%)                          | xx.x (xx)        | xx.x (xx)       | xx.x (95% CI)         | P= | xx.x (xx)        | xx.x (xx)       | xx.x (95% CI)         | P= | P=                   |
| HbA1c(mmol/mol) at 9 mths (%)                          | xx.x (xx)        | xx.x (xx)       | xx.x (95% CI)         | P= | xx.x (xx)        | xx.x (xx)       | xx.x (95% CI)         | P= | P=                   |
| <b>Other secondary metabolic outcomes</b>              |                  |                 |                       |    |                  |                 |                       |    |                      |
| Fasting glucose (mmol/L) at 3,6,9 mths                 | xx.x (xx)        | xx.x (xx)       | xx.x (95% CI)         | P= | xx.x (xx)        | xx.x (xx)       | xx.x (95% CI)         | P= | P=                   |
| Insulin resistance (HOMA-IR) at 3,6,9 mths             | xx.x (xx)        | xx.x (xx)       | xx.x (95% CI)         | P= | xx.x (xx)        | xx.x (xx)       | xx.x (95% CI)         | P= | P=                   |
| Fasting Lipids (mmol/L) at 3,6,9 mths                  |                  |                 |                       |    |                  |                 |                       |    |                      |
| Cholesterol mmol/L                                     | xx.x (xx)        | xx.x (xx)       | xx.x (95% CI)         | P= | xx.x (xx)        | xx.x (xx)       | xx.x (95% CI)         | P= | P=                   |
| LDL mmol/L                                             | xx.x (xx)        | xx.x (xx)       | xx.x (95% CI)         | P= | xx.x (xx)        | xx.x (xx)       | xx.x (95% CI)         | P= | P=                   |
| HDL mmol/L                                             | xx.x (xx)        | xx.x (xx)       | xx.x (95% CI)         | P= | xx.x (xx)        | xx.x (xx)       | xx.x (95% CI)         | P= | P=                   |
| Triglycerides mmol/L                                   | xx.x (xx)        | xx.x (xx)       | xx.x (95% CI)         | P= | xx.x (xx)        | xx.x (xx)       | xx.x (95% CI)         | P= | P=                   |
| Blood Pressure (mm Hg) at 3, 6 mths                    |                  |                 |                       |    |                  |                 |                       |    |                      |
| Systolic BP                                            | xx.x (xx)        | xx.x (xx)       | xx.x (95% CI)         | P= | xx.x (xx)        | xx.x (xx)       | xx.x (95% CI)         | P= | P=                   |
| Diastolic BP                                           | xx.x (xx)        | xx.x (xx)       | xx.x (95% CI)         | P= | xx.x (xx)        | xx.x (xx)       | xx.x (95% CI)         | P= | P=                   |
| Weight (kg) at 3, 6mths                                | xx.x (xx)        | xx.x (xx)       | xx.x (95% CI)         | P= | xx.x (xx)        | xx.x (xx)       | xx.x (95% CI)         | P= | P=                   |
| BMI (weight (kg)/height (m <sup>2</sup> ) at 3, 6 mths | xx.x (xx)        | xx.x (xx)       | xx.x (95% CI)         | P= | xx.x (xx)        | xx.x (xx)       | xx.x (95% CI)         | P= | P=                   |
| Waist circumference (cm)                               | xx.x (xx)        | xx.x (xx)       | xx.x (95% CI)         | P= | xx.x (xx)        | xx.x (xx)       | xx.x (95% CI)         | P= | P=                   |

|                                                                                   | HN001     |           |                       |    | B-glucan  |           |                       |    |                      |
|-----------------------------------------------------------------------------------|-----------|-----------|-----------------------|----|-----------|-----------|-----------------------|----|----------------------|
|                                                                                   | Yes       | No        | Mean diff<br>(95% CI) | P= | Yes       | No        | Mean diff (95%<br>CI) | P= | P for<br>interaction |
|                                                                                   | Mean (SD) | Mean (SD) |                       |    | Mean (SD) | Mean (SD) |                       |    |                      |
| <b>Secondary outcomes: Mental health and wellbeing outcomes at 6 and 9 months</b> |           |           |                       |    |           |           |                       |    |                      |
| DASS Total score                                                                  | xx.x (xx) | xx.x (xx) | xx.x (95% CI)         | P= | xx.x (xx) | xx.x (xx) | xx.x (95% CI)         | P= | P=                   |
| DASS Depression subscale                                                          | xx.x (xx) | xx.x (xx) | xx.x (95% CI)         | P= | xx.x (xx) | xx.x (xx) | xx.x (95% CI)         | P= | P=                   |
| DASS Anxiety subscale                                                             | xx.x (xx) | xx.x (xx) | xx.x (95% CI)         | P= | xx.x (xx) | xx.x (xx) | xx.x (95% CI)         | P= | P=                   |
| DASS Stress subscale                                                              | xx.x (xx) | xx.x (xx) | xx.x (95% CI)         | P= | xx.x (xx) | xx.x (xx) | xx.x (95% CI)         | P= | P=                   |
| SF 36                                                                             | xx.x (xx) | xx.x (xx) | xx.x (95% CI)         | P= | xx.x (xx) | xx.x (xx) | xx.x (95% CI)         | P= | P=                   |
| Physical Functioning                                                              | xx.x (xx) | xx.x (xx) | xx.x (95% CI)         | P= | xx.x (xx) | xx.x (xx) | xx.x (95% CI)         | P= | P=                   |
| Role Physical                                                                     | xx.x (xx) | xx.x (xx) | xx.x (95% CI)         | P= | xx.x (xx) | xx.x (xx) | xx.x (95% CI)         | P= | P=                   |
| Bodily Pain                                                                       | xx.x (xx) | xx.x (xx) | xx.x (95% CI)         | P= | xx.x (xx) | xx.x (xx) | xx.x (95% CI)         | P= | P=                   |
| General Health                                                                    | xx.x (xx) | xx.x (xx) | xx.x (95% CI)         | P= | xx.x (xx) | xx.x (xx) | xx.x (95% CI)         | P= | P=                   |
| Vitality                                                                          | xx.x (xx) | xx.x (xx) | xx.x (95% CI)         | P= | xx.x (xx) | xx.x (xx) | xx.x (95% CI)         | P= | P=                   |
| Social Functioning                                                                | xx.x (xx) | xx.x (xx) | xx.x (95% CI)         | P= | xx.x (xx) | xx.x (xx) | xx.x (95% CI)         | P= | P=                   |
| Role Emotional                                                                    | xx.x (xx) | xx.x (xx) | xx.x (95% CI)         | P= | xx.x (xx) | xx.x (xx) | xx.x (95% CI)         | P= | P=                   |
| Mental Health                                                                     | xx.x (xx) | xx.x (xx) | xx.x (95% CI)         | P= | xx.x (xx) | xx.x (xx) | xx.x (95% CI)         | P= | P=                   |
| Physical Component Summary<br>PCS                                                 | xx.x (xx) | xx.x (xx) | xx.x (95% CI)         | P= | xx.x (xx) | xx.x (xx) | xx.x (95% CI)         | P= | P=                   |
| Mental Component Summary<br>(MCS)                                                 | xx.x (xx) | xx.x (xx) | xx.x (95% CI)         | P= | xx.x (xx) | xx.x (xx) | xx.x (95% CI)         | P= | P=                   |

<sup>a</sup> Adjusted for time, baseline values of the outcome variable, plus baseline co-variates listed in Tables 1,2 and 3.

Supplement use, physical activity, diet, smoking, alcohol consumption and recreational drug use will also be collected at time 3, 6 and 9 months and tested for their interaction effect with the main exposures (HN001 and Beta-glucan) on the primary and secondary outcomes.

If interactions are significant ( $p < 0.05$ ), findings will be stratified by the interaction variable, and presented as below.

Table 5: The effects of HN001 and B-glucan and their interaction on the primary and secondary outcome variables stratified by *interaction variable*

|                                     | HN001     |           |                    | P= | B-glucan  |           |                    | P= | P for interaction |
|-------------------------------------|-----------|-----------|--------------------|----|-----------|-----------|--------------------|----|-------------------|
|                                     | Yes       | No        |                    |    | Yes       | No        |                    |    |                   |
|                                     | Mean (SD) | Mean (SD) | Mean diff (95% CI) | P= | Mean (SD) | Mean (SD) | Mean diff (95% CI) | P= | P=                |
| <b>Interaction variable level 1</b> |           |           |                    |    |           |           |                    |    |                   |
| HbA1c(mmol/mol) at 6 mths (%)       | xx.x (xx) | xx.x (xx) | xx.x (95% CI)      | P= | xx.x (xx) | xx.x (xx) | xx.x (95% CI)      | P= | P=                |
| <b>Interaction variable level 2</b> |           |           |                    |    |           |           |                    |    |                   |
| HbA1c(mmol/mol) at 6 mths %         | xx.x (xx) | xx.x (xx) | xx.x (95% CI)      | P= | xx.x (xx) | xx.x (xx) | xx.x (95% CI)      | P= | P=                |

Table 6: The effects of HN001 and B-glucan and their interaction on gastrointestinal adverse event prevalence.

|                                   | HN001 |       | RR (95% CI) | P= | B-glucan |       | RR (95% CI) | P= | P for interaction |
|-----------------------------------|-------|-------|-------------|----|----------|-------|-------------|----|-------------------|
|                                   | Yes   | No    |             |    | Yes      | No    |             |    |                   |
|                                   | N (%) | N (%) | RR (95% CI) | P= | N (%)    | N (%) | RR (95% CI) | P= | P for interaction |
| Increased nausea                  | n (%) | n (%) | RR (95% CI) |    | n (%)    | n (%) | RR (95% CI) |    |                   |
| Increased stomach ache/cramps     | n (%) | n (%) | RR (95% CI) |    | n (%)    | n (%) | RR (95% CI) |    |                   |
| Increased bloated/swollen stomach | n (%) | n (%) | RR (95% CI) |    | n (%)    | n (%) | RR (95% CI) |    |                   |
| Negative impact on bowel function | n (%) | n (%) | RR (95% CI) |    | n (%)    | n (%) | RR (95% CI) |    |                   |
